# Supplementary material for: Analysis of renal cancer cell lines from two major resources enables genomics-guided cell line selection
Source: PubMed Central journal article supplement (PMC5436135; doi:10.1038/ncomms15165), 2017-05-10
Supplement: ncomms15165-s1.pdf [file ncomms15165-s1.pdf]

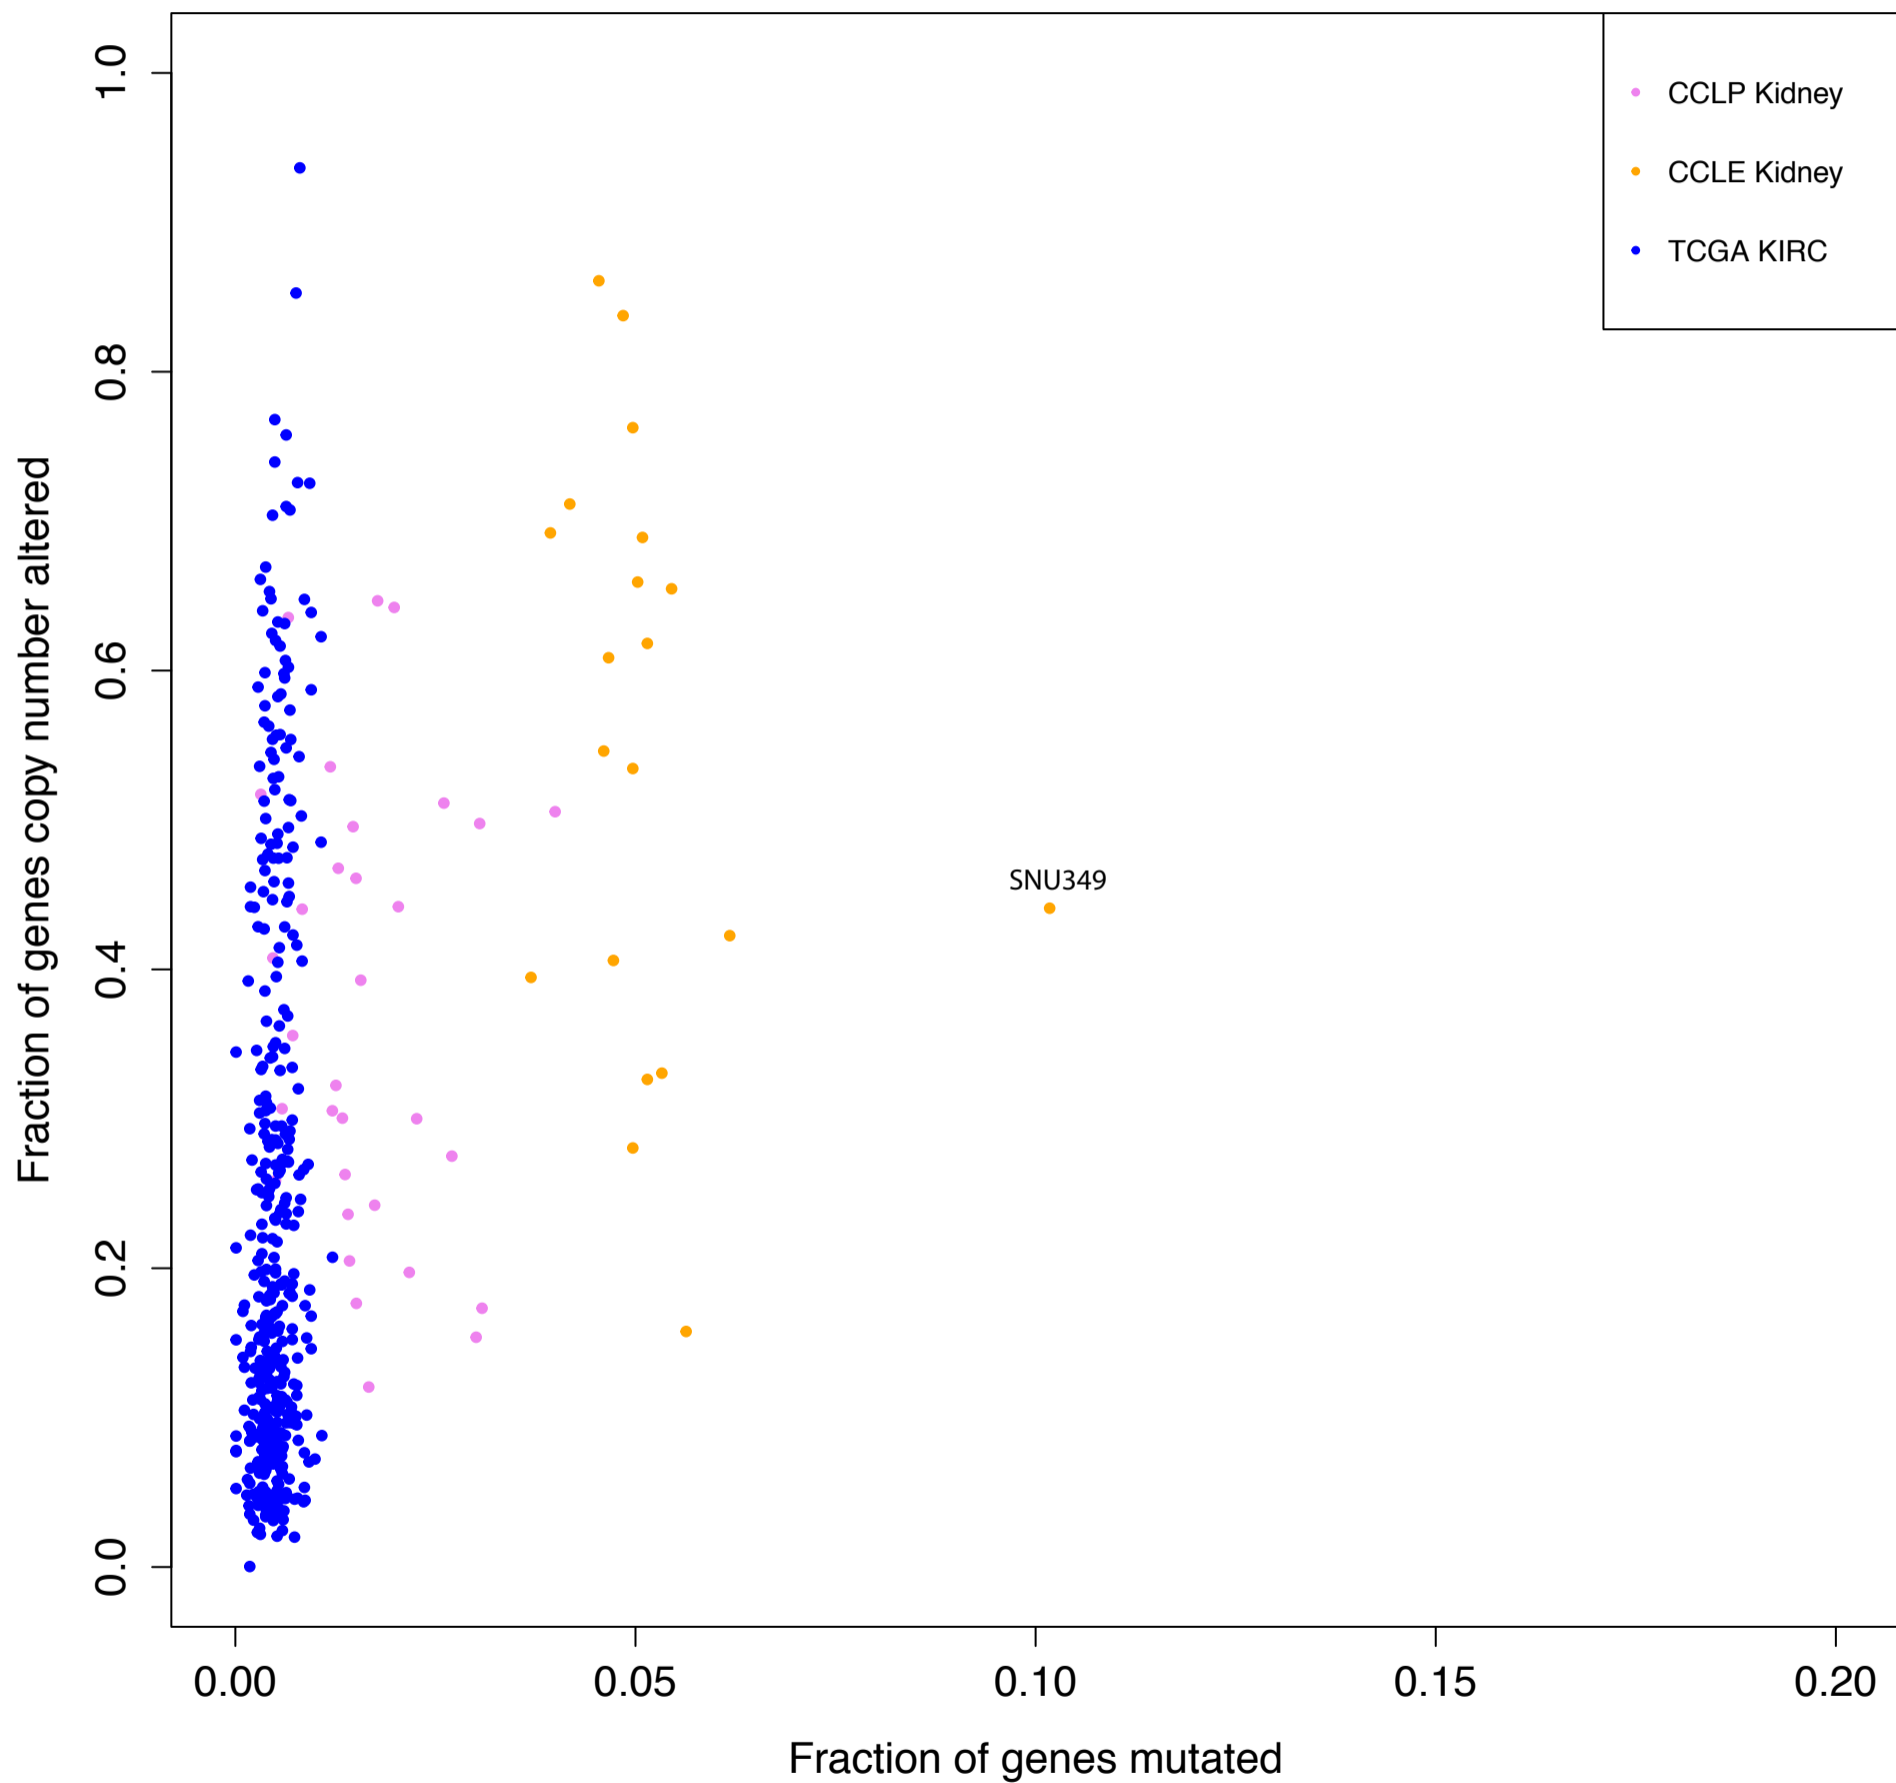

**Supplementary Figure 1. Mutational burden and copy number alterations in RCC cell lines and tumors.** Comparison of mutational burden and copy number alterations in TCGA clear cell renal tumors to CCLP and CCLE kidney cancer cell lines – SNU349 is a clear outlier based on mutation count.



Supplementary Table 2a. Chromosome 3p loss estimates for CCLF and CCLP cell lines (based on log2 ratios)

| Cell Line       | Chromosome 3p loss (based on log2 ratio $\leq$ -0.2) |
|-----------------|------------------------------------------------------|
| 769-P_CCLP      | 0.92                                                 |
| 786-0_CCLP      | 0.00                                                 |
| A498_CCLP       | 1.00                                                 |
| A704_CCLP       | 0.94                                                 |
| ACHN_CCLP       | 1.00                                                 |
| BB65-RCC_CCLP   | 0.99                                                 |
| BFTC-909_CCLP   | 0.03                                                 |
| CAKI-1_CCLP     | 0.66                                                 |
| CAL-54_CCLP     | 1.00                                                 |
| HA7-RCC_CCLP    | 0.80                                                 |
| KMRC-1_CCLP     | 0.33                                                 |
| KMRC-20_CCLP    | 0.99                                                 |
| LB1047-RCC_CCLP | 1.00                                                 |
| LB2241-RCC_CCLP | 0.91                                                 |
| LB996-RCC_CCLP  | 1.00                                                 |
| NCC010_CCLP     | 1.00                                                 |
| NCC021_CCLP     | 1.00                                                 |
| OS-RC-2_CCLP    | 1.00                                                 |
| RCC-AB_CCLP     | 1.00                                                 |
| RCC-ER_CCLP     | 1.00                                                 |
| RCC-FG2_CCLP    | 1.00                                                 |
| RCC-JF_CCLP     | 0.80                                                 |
| RCC-JW_CCLP     | 1.00                                                 |
| RCC-MF_CCLP     | 1.00                                                 |
| RCC10RGB_CCLP   | 0.97                                                 |
| RXF393_CCLP     | 0.99                                                 |
| SK-NEP-1_CCLP   | 1.00                                                 |
| SN12C_CCLP      | 0.01                                                 |
| TK10_CCLP       | 1.00                                                 |
| U031_CCLP       | 0.00                                                 |
| VMRC-RCW_CCLP   | 0.01                                                 |
| VMRC-RCZ_CCLP   | 1.00                                                 |
| 769P_CCLE       | 0.78                                                 |
| 786O_CCLE       | 0.97                                                 |
| A498_CCLE       | 1.00                                                 |
| A704_CCLE       | 0.92                                                 |
| ACHN_CCLE       | 0.56                                                 |
| BFTC909_CCLE    | 0.07                                                 |
| CAKI1_CCLE      | 1.00                                                 |
| CAKI2_CCLE      | 1.00                                                 |
| CAL54_CCLE      | 0.70                                                 |

|                |      |
|----------------|------|
| HEKTE_CCLE     | 0.00 |
| HK2_CCLE       | 0.00 |
| KMRC1_CCLE     | 1.00 |
| KMRC20_CCLE    | 1.00 |
| KMRC2_CCLE     | 0.82 |
| KMRC3_CCLE     | 1.00 |
| OSRC2_CCLE     | 1.00 |
| RCC10RGB_CCLE  | 0.97 |
| RCC4_CCLE      | 1.00 |
| SLR20_CCLE     | 0.00 |
| SLR21_CCLE     | 0.00 |
| SLR23_CCLE     | 1.00 |
| SLR25_CCLE     | 0.67 |
| SLR26_CCLE     | 0.82 |
| SNU1272_CCLE   | 1.00 |
| SNU349_CCLE    | 1.00 |
| TUHR10TKB_CCLE | 1.00 |
| TUHR14TKB_CCLE | 0.63 |
| TUHR4TKB_CCLE  | 0.58 |
| UMRC2_CCLE     | 0.67 |
| UMRC6_CCLE     | 1.00 |
| UOK101_CCLE    | 0.97 |
| VMRCRCW_CCLE   | 0.00 |
| VMRCRCZ_CCLE   | 1.00 |

Supplementary Table 2b. Chromosome 3p loss estimates for CCLP cell lines (based on minor allele copy number = 0).

| CCLP Cell Line | Chromosome 3p loss (minor allele copy number = 0) |
|----------------|---------------------------------------------------|
| 769-P          | 0.92                                              |
| 786-0          | 1.00                                              |
| A498           | 1.00                                              |
| A704           | 0.94                                              |
| ACHN           | 1.00                                              |
| BB65-RCC       | 1.00                                              |
| BFTC-909       | 0.08                                              |
| CAKI-1         | 0.09                                              |
| CAL-54         | 1.00                                              |
| HA7-RCC        | 0.81                                              |
| KMRC-1         | 1.00                                              |
| KMRC-20        | 0.99                                              |
| LB1047-RCC     | 1.00                                              |
| LB2241-RCC     | 0.92                                              |
| LB996-RCC      | 1.00                                              |
| NCC010         | 1.00                                              |
| NCC021         | 1.00                                              |
| OS-RC-2        | 1.00                                              |
| RCC-AB         | 1.00                                              |
| RCC-ER         | 1.00                                              |
| RCC-FG2        | 1.00                                              |
| RCC-JF         | 0.82                                              |
| RCC-JW         | 1.00                                              |
| RCC-MF         | 1.00                                              |
| RCC10RGB       | 0.98                                              |
| RXF393         | 1.00                                              |
| SK-NEP-1       | 0.05                                              |
| SN12C          | 0.01                                              |
| TK10           | 1.00                                              |
| U031           | 0.04                                              |
| VMRC-RCW       | 0.99                                              |
| VMRC-RCZ       | 1.00                                              |

Supplementary Table 3. Mutations in key kidney cancer genes in kidney cancer cell lines in CCLE and CCLP.

Tier 1 (Green): Identical mutations in given gene,

Tier 2 (Blue): Non-identical mutations reported by CCLE and CCLP,

Tier 3 (Red): Discrepancy in mutational status – only one of the databases reports a mutation.

| Cell Line       | ARID1A | BAP1        | FH      | FLCN | MET      | MLL3          | MTOR     | PIK3CA   | PTEN          | SMARCB1 | TP53          | TSC2         | VHL           | KDM5C | CDKN1A | NF2         | NFE2L2 | PBRM1       | SETD2        | TSC1    |
|-----------------|--------|-------------|---------|------|----------|---------------|----------|----------|---------------|---------|---------------|--------------|---------------|-------|--------|-------------|--------|-------------|--------------|---------|
| 769.P_CCLP      | -      | p.Y33D      | -       | -    | -        | -             | -        | -        | -             | -       | -             | p.I606V      | p.I180N       | -     | -      | -           | -      | -           | -            | -       |
| 769P_CCLE       | NA     | p.Y33D      | -       | -    | -        | -             | -        | -        | -             | -       | -             | p.I606V      | p.I180N       | NA    | -      | -           | NA     | NA          | NA           | -       |
| 786.0_CCLP      | -      | -           | -       | -    | -        | -             | -        | -        | p.Q149*       | -       | p.?_p.P278A   | -            | p.G104fs*55   | -     | -      | -           | -      | -           | -            | -       |
| 786O_CCLE       | NA     | -           | -       | -    | -        | p.A3902G      | -        | -        | p.Q149*       | -       | p.R248W       | p.D1126V     | -             | NA    | -      | -           | NA     | NA          | NA           | -       |
| A498_CCLP       | -      | -           | -       | -    | -        | p.G2986D      | -        | -        | -             | -       | -             | -            | p.G144fs*14   | -     | -      | -           | -      | -           | p.V2033fs*9  | -       |
| A498_CCLE       | NA     | -           | -       | -    | -        | p.G2986D      | -        | -        | -             | -       | -             | -            | p.V142fs      | NA    | -      | -           | NA     | NA          | NA           | -       |
| A704_CCLP       | -      | -           | -       | -    | -        | p.P3633P      | -        | -        | -             | -       | R_p.Y126D_p   | -            | p.I180N       | -     | -      | -           | -      | p.E572fs*16 | -            | -       |
| A704_CCLE       | NA     | -           | -       | -    | -        | p.H475del     | -        | -        | -             | -       | -             | -            | p.I180N       | NA    | -      | -           | NA     | NA          | NA           | -       |
| ACHN_CCLP       | -      | -           | -       | -    | -        | -             | -        | -        | -             | -       | -             | -            | -             | -     | -      | p.R57*      | -      | p.R1052*    | -            | -       |
| ACHN_CCLE       | NA     | -           | -       | -    | -        | -             | -        | -        | -             | -       | -             | -            | -             | NA    | -      | -           | NA     | NA          | NA           | -       |
| BB65.RCC_CCLP   | -      | -           | -       | -    | -        | -             | -        | -        | -             | -       | p.R248W       | -            | p.P192fs*10   | -     | -      | -           | -      | -           | -            | -       |
| BFTC.909_CCLP   | -      | -           | -       | -    | -        | -             | -        | p.E545K  | -             | -       | E224*_p.S24   | -            | -             | -     | -      | -           | -      | p.G1177S    | -            | -       |
| BFTC909_CCLE    | NA     | -           | -       | -    | -        | -             | -        | p.E545K  | -             | -       | S241C_p.E22   | -            | -             | NA    | -      | -           | -      | NA          | NA           | -       |
| CAKI.1_CCLP     | -      | -           | -       | -    | p.V1238I | -             | -        | -        | -             | -       | -             | -            | -             | -     | -      | -           | -      | -           | p.?          | -       |
| CAKI1_CCLE      | NA     | -           | -       | -    | p.V1238I | p.G892E       | -        | -        | -             | -       | -             | -            | -             | NA    | -      | -           | NA     | NA          | NA           | -       |
| CAKI2_CCLE      | NA     | -           | -       | -    | -        | -             | -        | -        | -             | -       | -             | -            | p.R177*       | NA    | -      | -           | NA     | NA          | NA           | -       |
| CAL.54_CCLP     | -      | -           | p.I120V | -    | -        | p.C3460F      | -        | -        | -             | -       | -             | -            | -             | -     | -      | -           | -      | -           | -            | -       |
| CAL54_CCLE      | NA     | -           | p.I120V | -    | -        | p.C3460F      | -        | -        | -             | -       | -             | -            | -             | NA    | -      | -           | -      | NA          | NA           | -       |
| HA7.RCC_CCLP    | -      | -           | -       | -    | -        | -             | -        | -        | -             | -       | -             | -            | -             | -     | -      | -           | p.D27A | -           | -            | -       |
| KMRC1_CCLE      | NA     | -           | -       | -    | -        | -             | -        | -        | p.?           | p.P156S | -             | -            | -             | NA    | -      | -           | NA     | NA          | NA           | -       |
| KMRC1_CCLP      | -      | -           | -       | -    | -        | -             | -        | -        | p.?           | p.P165S | -             | -            | -             | -     | -      | -           | -      | p.W1183*    | -            | -       |
| KMRC20_CCLE     | NA     | p.E31K      | -       | -    | -        | -             | p.W1304R | -        | -             | -       | p.E224_splice | -            | -             | NA    | -      | -           | NA     | NA          | NA           | -       |
| KMRC20_CCLP     | -      | -           | -       | -    | -        | -             | p.W1304R | -        | -             | -       | p.?           | -            | p.S168fs*5    | -     | -      | -           | -      | p.N453Y     | -            | -       |
| KMRC2_CCLE      | NA     | -           | -       | -    | -        | -             | p.Y1974H | -        | -             | -       | -             | -            | -             | NA    | -      | -           | NA     | NA          | NA           | -       |
| KMRC3_CCLE      | NA     | -           | -       | -    | -        | -             | -        | -        | -             | -       | -             | -            | -             | NA    | -      | -           | NA     | NA          | NA           | -       |
| LB1047.RCC_CCLP | -      | -           | -       | -    | -        | -             | -        | -        | -             | -       | -             | -            | -             | -     | -      | p.?         | -      | p.R1245G    | -            | -       |
| LB2241.RCC_CCLP | -      | -           | -       | -    | -        | -             | -        | -        | -             | -       | -             | -            | -             | -     | -      | p.?         | -      | -           | -            | -       |
| LB996.RCC_CCLP  | -      | -           | -       | -    | -        | p.S3080P      | -        | -        | -             | -       | -             | -            | -             | -     | -      | p.A105fs*20 | -      | -           | p.G1141*     | -       |
| NCC010_CCLP     | -      | -           | -       | -    | -        | -             | p.L2209V | -        | -             | -       | -             | p.D559V      | p.V130F       | -     | -      | -           | -      | p.K1269*    | -            | -       |
| NCC021_CCLP     | -      | -           | -       | -    | -        | -             | -        | -        | -             | -       | p.?           | -            | -             | -     | -      | -           | -      | -           | -            | -       |
| OS.RC.2_CCLP    | -      | -           | -       | -    | -        | -             | -        | -        | p.?           | -       | -             | -            | -             | -     | -      | -           | -      | p.I233T     | -            | -       |
| OSRC2_CCLE      | NA     | -           | -       | -    | -        | p.Y816fs      | -        | -        | p.N212_splice | -       | -             | -            | -             | NA    | -      | -           | NA     | NA          | NA           | -       |
| RCC.AB_CCLP     | -      | -           | -       | -    | -        | -             | -        | -        | -             | -       | -             | -            | -             | -     | -      | p.K294*     | -      | -           | p.R1629fs*15 | -       |
| RCC.ER_CCLP     | -      | -           | -       | -    | -        | -             | p.P770A  | -        | -             | -       | -             | -            | -             | -     | -      | -           | -      | -           | -            | -       |
| RCC.FG2_CCLP    | -      | -           | -       | -    | -        | fs*73_p.P15   | -        | -        | -             | -       | p.R248W       | -            | p.D143fs*16   | -     | -      | -           | p.G31A | p.D251fs*31 | p.L152*      | -       |
| RCC.JF_CCLP     | -      | -           | -       | -    | -        | -             | -        | -        | -             | -       | R213Q_p.R21   | p.E75K_p.E75 | fs*11_p.F14   | -     | -      | -           | -      | Q477*_p.Q47 | -            | -       |
| RCC.JW_CCLP     | -      | -           | -       | -    | -        | p.P2326Q      | p.L2138F | -        | -             | -       | -             | -            | p.H115Y       | -     | -      | -           | -      | -           | p.A879A      | -       |
| RCC.MF_CCLP     | -      | -           | -       | -    | -        | p.G2474E      | -        | -        | -             | -       | -             | -            | -             | -     | p.P79H | -           | -      | p.N528fs*41 | 257_H1259del | p.Y761* |
| RCC10RGB_CCLP   | -      | p.?-p.?     | -       | -    | -        | -             | -        | -        | p.R377H       | -       | -             | -            | -             | -     | -      | -           | -      | -           | -            | -       |
| RCC10RGB_CCLE   | NA     | -           | -       | -    | -        | -             | -        | -        | -             | -       | -             | -            | -             | NA    | -      | -           | NA     | NA          | NA           | -       |
| RXF393_CCLP     | -      | -           | -       | -    | -        | -             | -        | -        | -             | -       | p.R175H       | -            | -             | -     | -      | -           | -      | -           | -            | -       |
| SK.NEP.1_CCLP   | -      | -           | -       | -    | -        | -             | -        | -        | -             | -       | p.G245S       | -            | -             | -     | -      | -           | -      | -           | -            | -       |
| SN12C_CCLP      | -      | p.F168F     | -       | -    | -        | -             | -        | -        | -             | -       | p.E336*       | -            | -             | -     | -      | p.?         | -      | -           | -            | -       |
| SNU1272_CCLE    | NA     | -           | -       | -    | -        | -             | -        | -        | -             | -       | -             | -            | p.H115Q       | NA    | -      | -           | NA     | NA          | NA           | -       |
| SNU349_CCLE     | NA     | -           | -       | -    | -        | p.T107A       | p.E1799K | -        | -             | -       | -             | -            | -             | NA    | -      | -           | NA     | NA          | NA           | -       |
| SW156_CCLP      | -      | -           | -       | -    | -        | -             | -        | -        | p.T321fs*23   | -       | -             | -            | -             | -     | -      | -           | -      | Q489K_p.D7  | -            | -       |
| TK10_CCLP       | -      | -           | -       | -    | -        | p.S388P_p.D48 | -        | p.L719V  | -             | -       | p.L264R       | -            | -             | -     | -      | -           | -      | -           | -            | -       |
| TUHR10TKB_CCLE  | NA     | -           | -       | -    | -        | -             | -        | p.V2006L | -             | -       | -             | -            | p.E186fs      | NA    | -      | -           | NA     | NA          | NA           | -       |
| TUHR14TKB_CCLE  | NA     | p.S287*     | -       | -    | -        | -             | -        | -        | -             | -       | -             | -            | p.L153P       | NA    | -      | -           | NA     | NA          | NA           | -       |
| TUHR4TKB_CCLE   | NA     | -           | -       | -    | -        | -             | -        | -        | -             | -       | -             | -            | -             | NA    | -      | -           | NA     | NA          | NA           | -       |
| U031_CCLP       | -      | -           | -       | -    | -        | -             | p.L2209L | -        | -             | -       | -             | -            | -             | -     | -      | -           | -      | -           | -            | -       |
| VMRC.RCW_CCLP   | -      | p.K580fs*37 | -       | -    | -        | -             | -        | -        | -             | -       | p.?           | -            | p.R161fs*12   | -     | -      | -           | -      | -           | -            | -       |
| VMRCRCW_CCLE    | NA     | p.K580fs    | -       | -    | -        | -             | -        | -        | -             | -       | -             | -            | p.E160fs      | NA    | -      | -           | NA     | NA          | NA           | -       |
| VMRCRCZ_CCLE    | NA     | -           | -       | -    | p.E168D  | -             | -        | -        | -             | -       | -             | -            | p.V155_splice | NA    | -      | -           | NA     | NA          | NA           | -       |
| VMRC.RCZ_CCLP   | -      | -           | -       | -    | -        | -             | -        | -        | -             | -       | p.D48fs*74    | -            | p.?           | -     | -      | -           | -      | -           | -            | -       |
